# Supplementary material for: Genome-wide in silico identification of membrane-bound transcription factors in plant species
Source: PeerJ journal article supplement (doi:10.7717/peerj.4051), 2017-11-15
Supplement: Figure_S1.pdf [file Figure_S1.pdf]

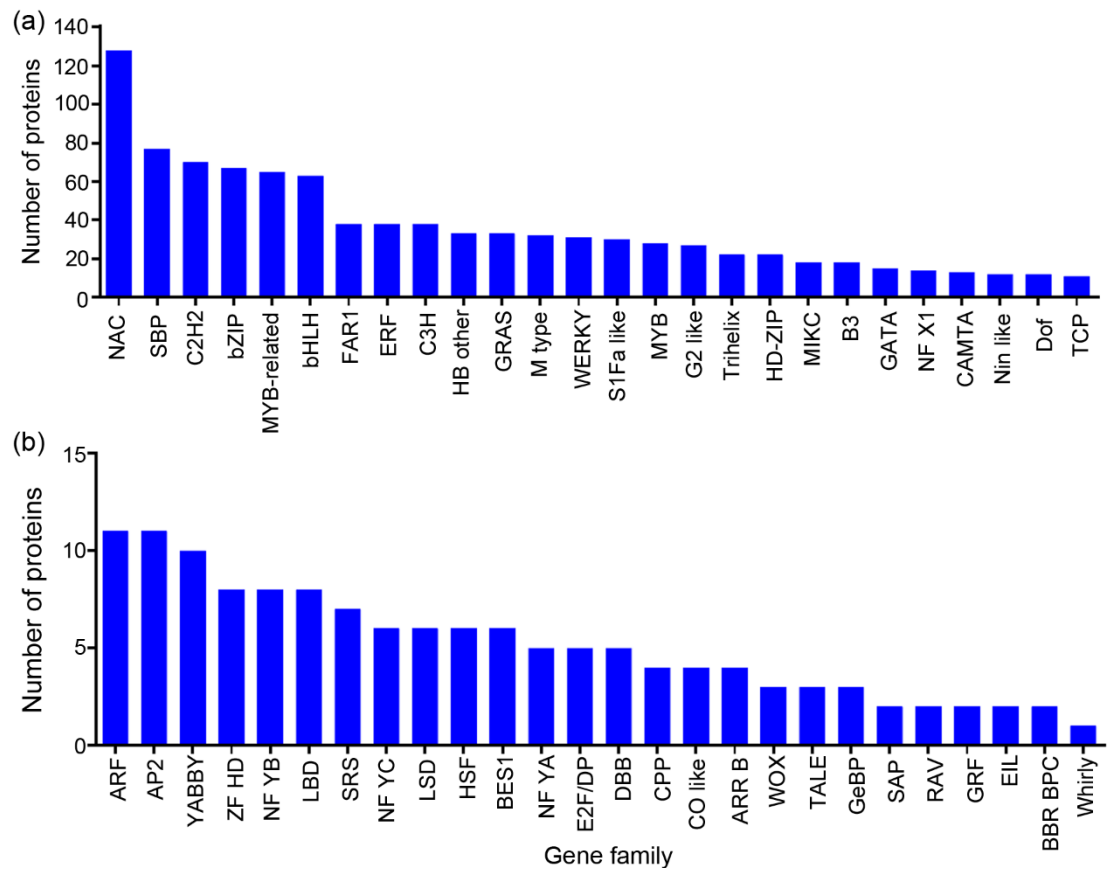

**Fig. S1.** Gene family of membrane-bound transcription factors in the 14 plant species.
